# Supplementary material
Source: publisher figshare collection journal article supplement (https://frontiersin.figshare.com/ndownloader/files/14376947)
Supplement: Supplementary file [file 14376947]

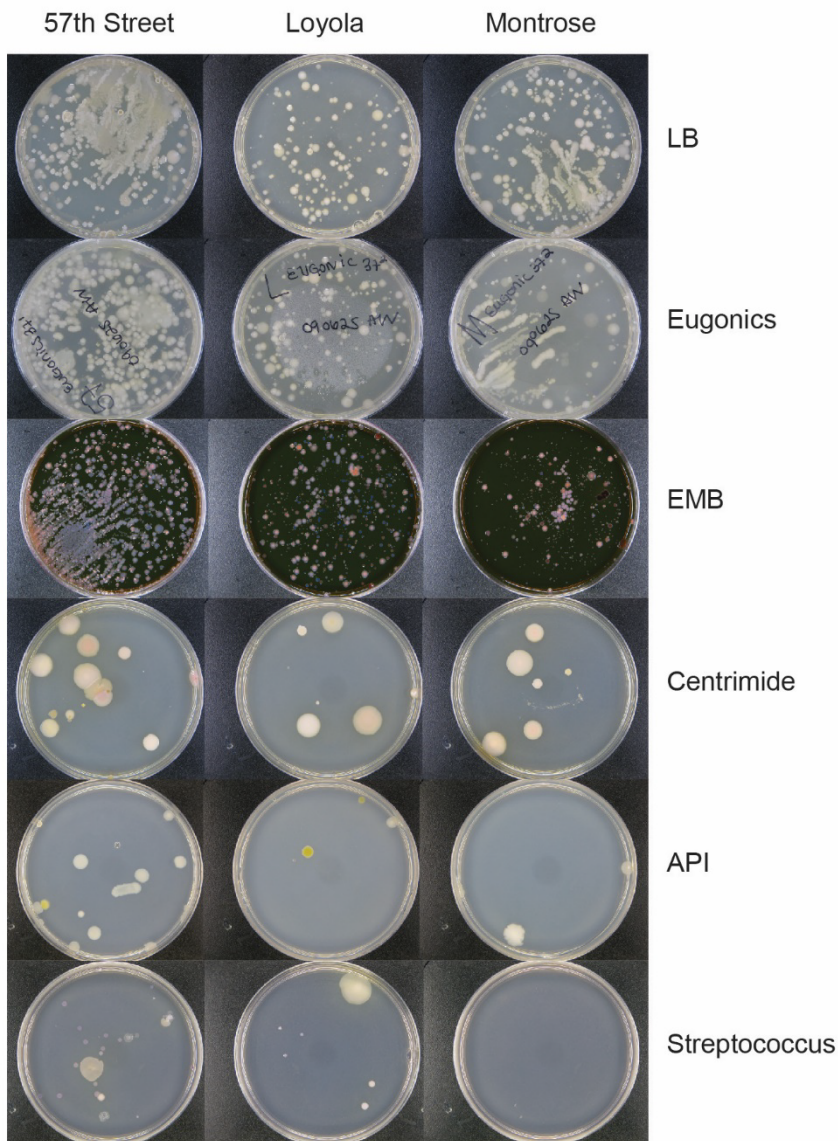

**Supplementary Image 1.** Colonies grown on selective medias for the three beaches sampled on June 24, 2009.
